# Supplementary material for: Gastric Expression of Plasminogen Activator Inhibitor (PAI)-1 Is Associated with Hyperphagia and Obesity in Mice
Source: PubMed Central journal article supplement — Endocrinology. 2012 Dec 18;154(2):718–26. doi: 10.1210/en.2012-1913 (PMC3724960; doi:10.1210/en.2012-1913), 2012-12-18
Supplement: supp_en.2012-1913_EN-12-1913SuppMeth.pdf [file supp_en.2012-1913_EN-12-1913SuppMeth.pdf]

**Supplemental Methods: PCR probes.**

(a) PAI-1 mRNA was determined in three different assays:

(i) **Wild type PAI-1** (ie excluding transgene) primers/probe:

Forward: 5'-TGCACAAGAAGGTACCGTGAAT-3'

Reverse: 5'-AGAAAAGCAAAAACACCAACATGA-3'

Probe: 5'-ATT-TCCTAGCAGGCCACTCTGCATCTGTT-3'

(ii) **Total PAI-1** (ie wild type and transgene) primers:

Forward: 5'-CATCAGGCCACCGACTTCGGAGTA-3'

Reverse: 5'-CTGCCGCCGGG- TTTTCCC-3'

(iii) **Transgenic PAI-1** (ie excluding wild type) primers:

Forward: 5'-CCACATTTGTAGAGGTTTTACTTGAT-3'

Reverse: 5'-TGTGSSSTTTGTGSTGCTATTGCTT-3'

(b) **GAPDH** mRNA primers:

Forward: 5'-TCTTGTGCAGTGCCAGCCTC-3'

Reverse: 5'- TGGCAGCCCTGGTGACCA-3'

(c) **Ghrelin** mRNA primers/probe:

Forward: 5'-GGCAGGCTCCAGCTTCCT-3'

Reverse: 5'-GCAGTTTAGCTGGTGGCTTCTT-3'

Probe: 5'<sup>3</sup>CACCAGAAAGCCCAGCAGAGAAAGGAATC -3'

(d) **uPAR** mRNA primers:

Forward: 5'-CCACAAACCTCTGCAACAGGC-3'

Reverse: 5'-ATTCATTGGTCCCCGGCA-3'

# Supplemental Fig. 1

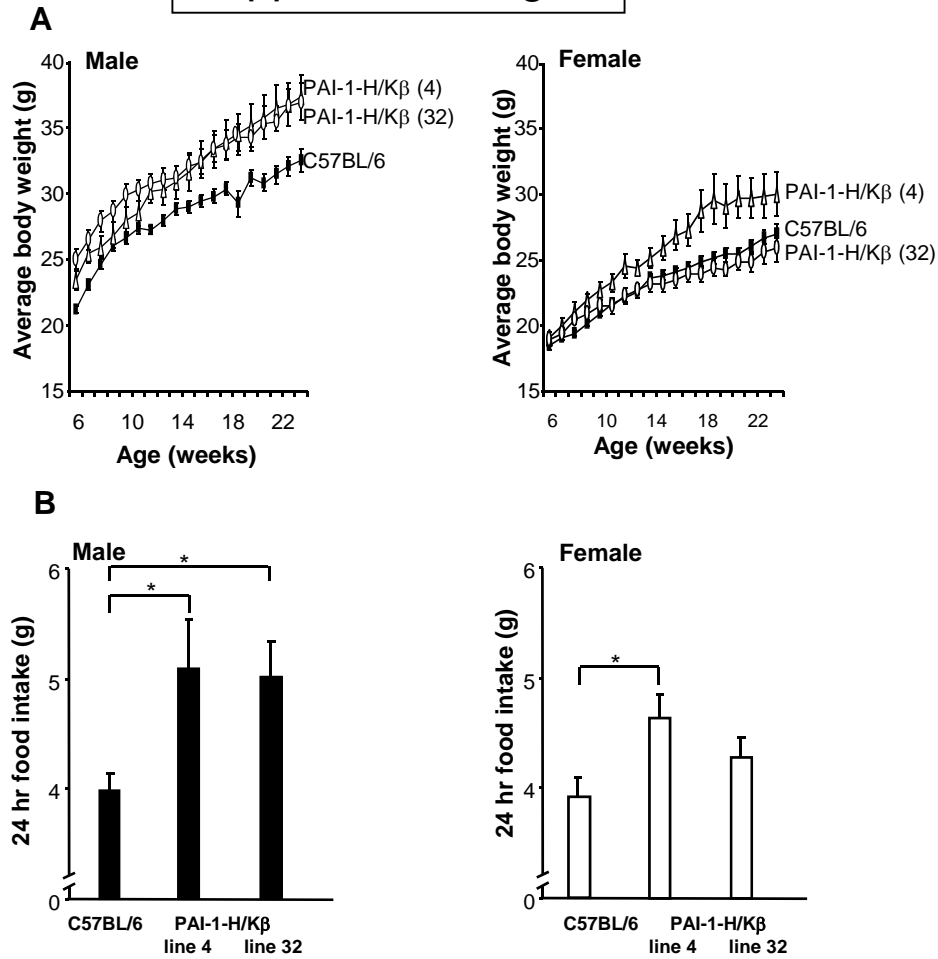

SUPPLEMENTAL Fig 1. A, Body weight from 6-24 week male and female C57BL/6, PAI-1-H/K $\beta$  (line 4) and PAI-1-H/K $\beta$  (line32) mice. B, 24 hr food intake for 12 week C57BL/6, PAI-1-H/K $\beta$  (line 4) and PAI-1-H/K $\beta$  (line 32) mice. \*,  $p < 0.05$ ,  $n = 8$ .

## Supplemental Fig. 2

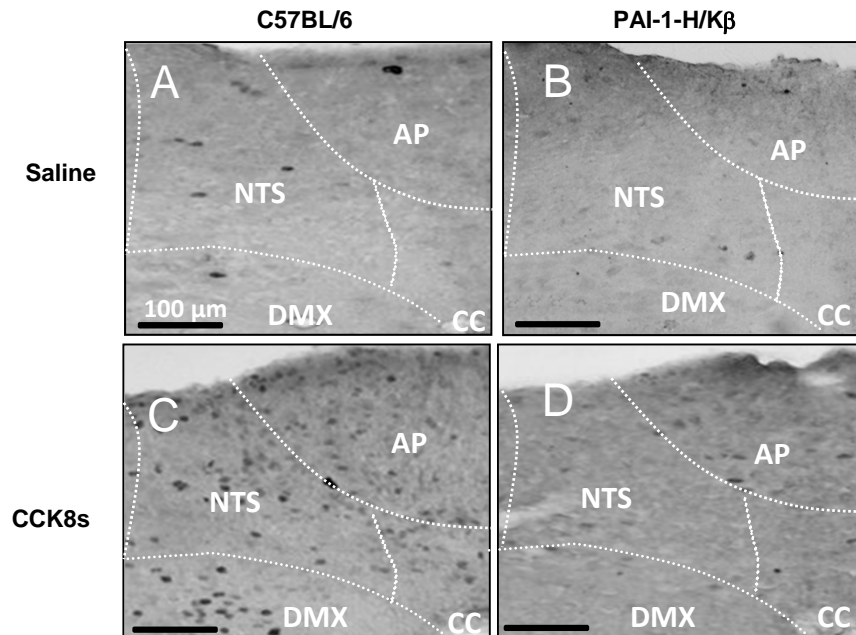

SUPPLEMENTAL Fig 2. Suppressed stimulation of c-fos in NTS neurons in PAI-1-H/K $\beta$  mice in response to CCK8s. A, Saline-injected C57BL/6 mouse. B, Saline injected PAI-1-H/K $\beta$  mouse. C, CCK8s (2.5 nmol/kg, ip) injected C57BL/6 mouse. D, CCK8s (2.5 nmol/kg, ip) injected PAI-1-H/K $\beta$  mouse. Neurons with stained nuclei (in focus in a single focal plane) in the NTS were counted for quantitative studies. NTS, nucleus tractus solitarius; AP, area postrema; DMX, dorsal motor nucleus of the vagus; CC, central canal. Scale bar 100  $\mu$ m

## Supplemental Fig. 3

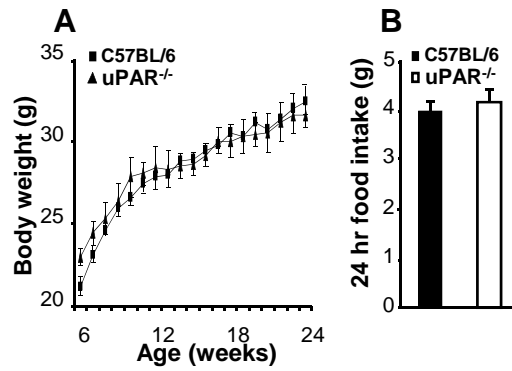

SUPPLEMENTAL Fig 3. Body weight and food intake in uPAR<sup>-/-</sup> mice is similar to C57BL/6 mice A, Body weight of male C57BL/6 and uPAR<sup>-/-</sup> mice from 6 to 24 weeks of age. B, 24 hr food intake in 12 week old C57BL/6 and uPAR<sup>-/-</sup> male mice. n=8.

## Supplemental Fig. 4

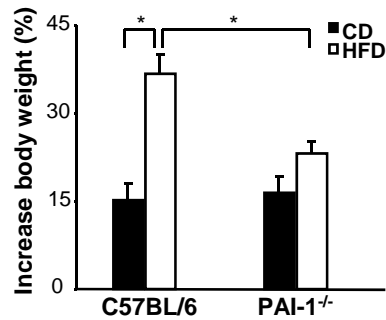

SUPPLEMENTAL Fig 4. Effect of high fat diet on body weight in PAI-1<sup>-/-</sup> mice. PAI-1<sup>-/-</sup> mice showed a significantly decreased weight gain (expressed as a % of initial weight) compared to C57BL/6 mice after feeding a high fat diet (HFD) for 4 weeks. However, the weight gain in the two strains was similar on a control diet (CD). At the start of the experiment the average body weight of C57BL/6 and PAI-1<sup>-/-</sup> mice was  $21.98 \pm 0.31$  g and  $20.27 \pm 0.77$  g respectively \*, $p < 0.05$ ,  $n = 7$  per group.

## Supplemental Fig. 5

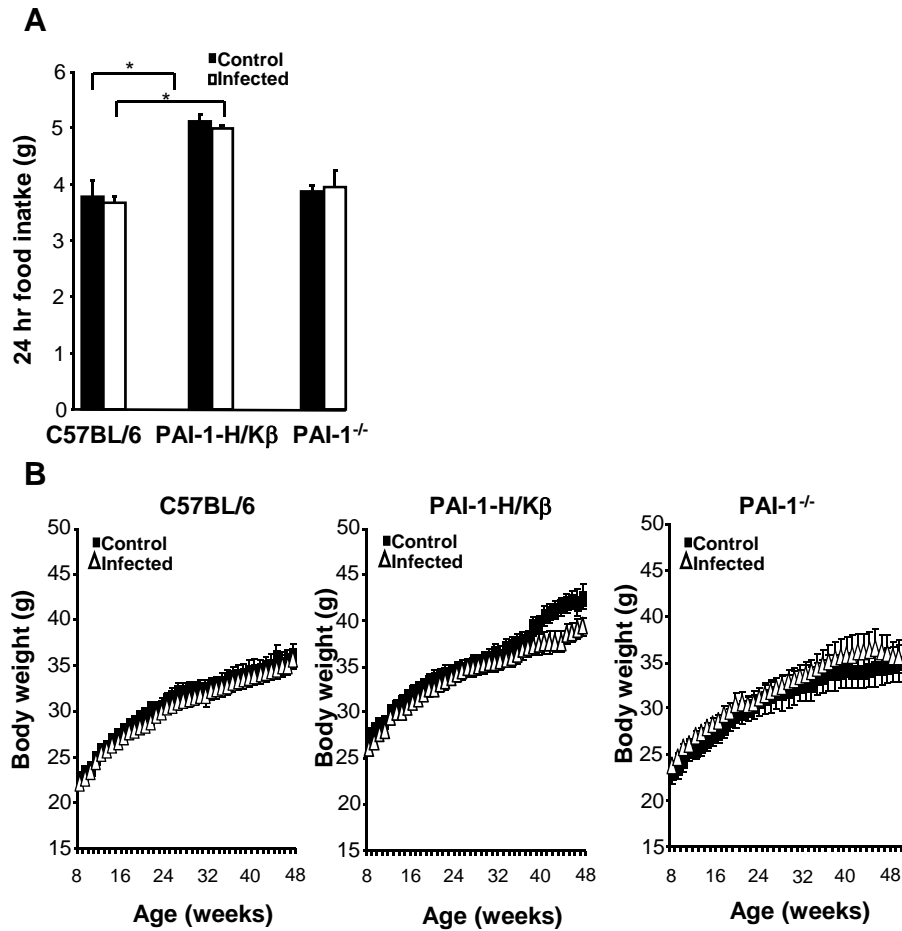

SUPPLEMENTAL Fig 5. Food intake and body weight of control and *H.felis* infected mice. A, 24 hr food intake of control and *H.felis* infected C57BL/6, PAI-1-H/Kβ and PAI-1<sup>-/-</sup> mice 6 months postinfection. B, Body weight data from ages 8-47 weeks in infected and control C57BL/6, PAI-1-H/Kβ and PAI-1<sup>-/-</sup> mice.

## Supplemental Fig. 6

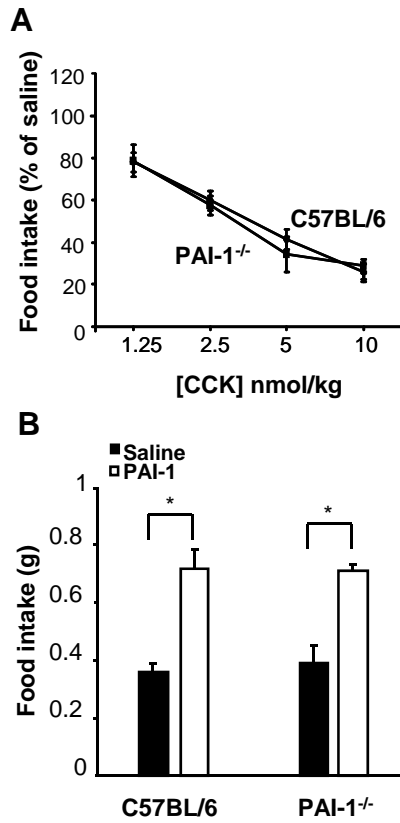

SUPPLEMENTAL Fig 6. Effect of CCK8s and exogenous PAI-1 on food intake in PAI-1<sup>-/-</sup> mice. A, The satiety action of CCK8s in PAI-1<sup>-/-</sup> mice is similar to that in C57BL/6 mice. B, Food intake (30 min) following an over-night fast is increased in both C57BL/6 and PAI-1<sup>-/-</sup> mice in response to exogenous PAI-1 (2.5 nmol/kg, ip). \*, $p < 0.05$ ,  $n = 6$ .
